# Supplementary material
Source: Springer Nature journal article supplement (https://www.springermedizin.de/resource/supplementary/12933_2012_525_MOESM6_ESM.pdf/9538668)
Supplement: MOESM6 [file 9538668]

**Table 1.Characteristics of rats at the end of the study (12 weeks)**

| Group   | n | Glycemia<br>(mmol/l) | Body weight<br>(g) | Heart wt/body wt<br>(mg/g) |
|---------|---|----------------------|--------------------|----------------------------|
| NC      | 8 | 6.44±0.24            | 480±35             | 2.62±0.16                  |
| NC+ALA  | 8 | 6.26±0.19            | 492±35             | 2.60±0.18                  |
| STZ     | 8 | 28.41±2.84*          | 273±45*            | 3.25±0.25*                 |
| STZ+ALA | 8 | 26.25±3.49*          | 277±20*            | 3.06±0.23*#                |

Eight rats per group. Data are presented as mean values ± standard deviation.

\*p<0.05 vs. NC group; # p<0.05 vs. STZ group.
